# Supplementary material for: Isolating, Identifying, and Analyzing the Biological Characteristics of Pathogens Causing Postharvest Disease in Fresh Radix Astragali
Source: MDPI journal article supplement (doi:10.3390/horticulturae9091019), 2023-09-09
Supplement: s1 [file s1]

Figure 3 in main article was a concatenation of the following figures (Figure S1 ~ Figure S3):

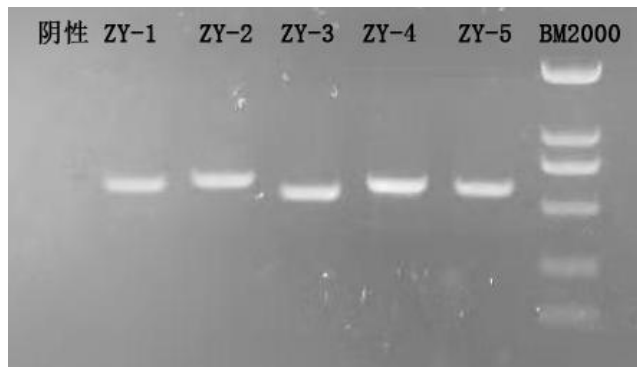

Figure S1. *ITS* gel electrophoresis image of PCR amplification product ((ZY-1 is Z1, ZY-2 is Z2, ZY-3 is Z3)

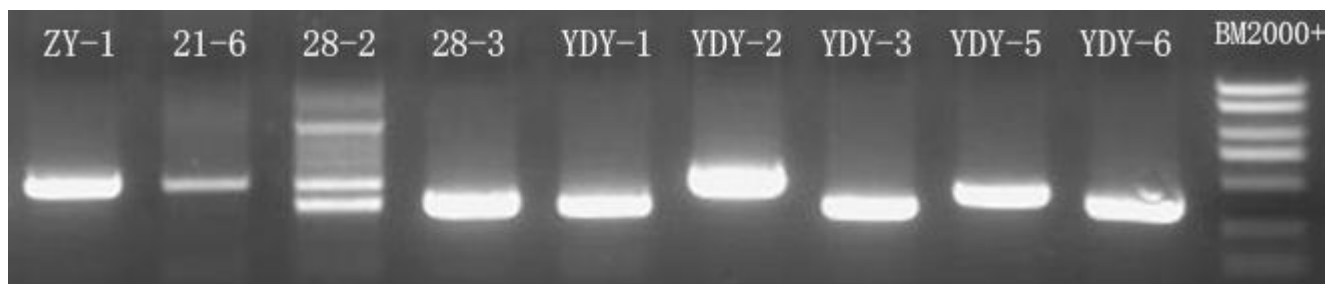

(a)

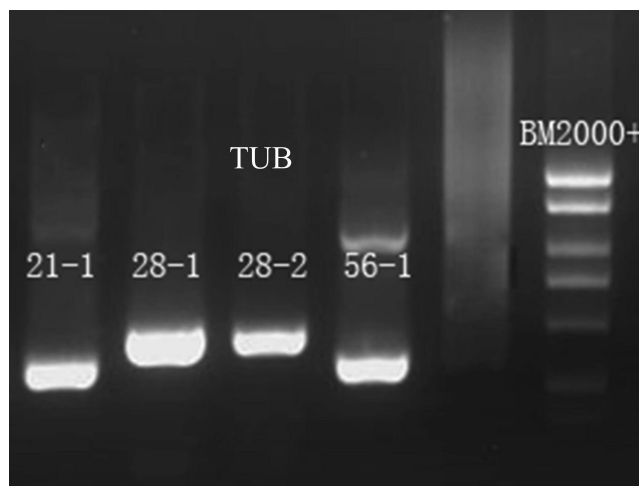

(b)

Figure S2. *TUB* gel electrophoresis image of PCR amplification product ((a): ZY-1 is Z1, (b): 56-1 is Z2, (b): 21-1 is Z3)

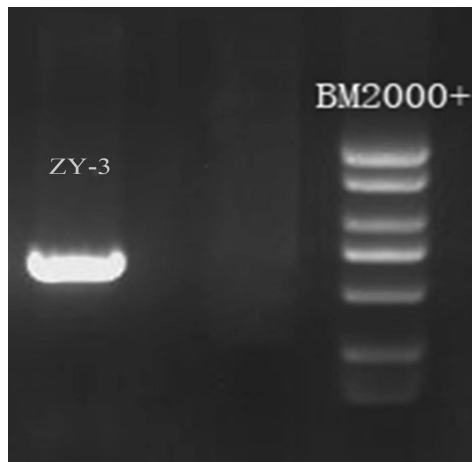

Figure S3. *TEF*-Z3 gel electrophoresis image of PCR amplification product

>Z1-ITS

GATATGCTTAAGTTCAGCGGGTATCCCTACCTGATCCGAGGTCAACCTGGATAAAAATT  
TGGGTTGATCGGCAAGCGCCGGCCGGGCTACAGAGCGGGTGACAAAGCCCCATACG  
CTCGAGGACCGGACGCGGTGCCGCCGCTGCCTTTCGGGCCCCGTCCCCCGGAATCGGA  
GGACGGGGCCCAACACACAAGCCGGGCTTGAGGGCAGCAATGACGCTCGGACAGGC  
ATGCCCCCGGAATACCAGGGGGCGCAATGTGCGTTCAAAGACTCGATGATTCACTGA  
ATTTGCAATTCACATTACGTATCGCATTTTCGCTGCGTTCTTCATCGATGCCGGAACCAAG  
AGATCCGTTGTTGAAAGTTTTAAATAATTTATATTTTCACTCAGACTTCAATCTTCAGAC  
AGAGTTCGGGGGTGTCTTCGGCGGGCGCGGGCCCCGGGGGCGTGAGCCCCCGGCGGC  
CAGTAAAGGCGGGCCCCGCCGAAGCAACAAGGTAAAATAAACACGGGTGGGAGGTTGG  
ACCCAAAGGGCCCTCACTCGGTAATGATCCTTCCGCAGGTTACCTACGGAAACCTTG  
TTACG

>Z2-ITS

GATATGCTTAAGTTCAGCGGGTATTCCTACCTGATCCGAGGTCAACCTTGGTAAAAGTT  
TGGGGTTTTACGGCGTGGCCGCGCCGCCCTTCCGCCCGCGAGGTTTGTGCTACTACGCG  
GAGGAGGCAGCGGCGAGGCCGCCACTGGGTTTCGGGGACAGGCGCCCTTGGAGGAC  
GCCTGGGCCCCAACGCCGGGCCCCGCCCTCCCCCGCGAGGGGAAAAGGGGGGGGC  
CCGAGGGTTGAAATGACGCTCGGACAGGCATGCCCCGCCAGAATACTGGCGGGCGCAA  
TGTGCGTTCAAAGATTCGATGATTCACTGAATTCTGCAATTCACATTACTTATCGCATTT  
CGCTGCGTTCTTCATCGATGCCAGAACCAAGAGATCCGTTGTTGAAAGTTTTGATTTGT  
TTTGTGCTTTCGGCTCGCTCAGAGGATACACATGTTTGTAAACAGGGTTCGTGTGG  
TCCCCGGCGGGCGCCTTGGGTCCGGGGCACGCAGCGCCCGGGGCGGTCCGCCGAAGC  
AACGGTAGGTAAGGTTCAAAAGGGTTGGGAGTTGTTTTGTAACTCTATAATGATCCC  
TCCGCTGGTTCACCAACGGAGACCTTGTTACG

>Z3-ITS

TGATATGCTTAAGTTCAGCGGGTATTCCTACCTGATCCGAGGTCAACATTCAGAAGTTG  
GGGTTTTACGGCGTGGCCGCGACGATTACCAGTAACGAGGTGTATGATTACTACGCTAT  
GGAAGCTCGACGTGACCGCCAATCGATTTGGGGAACGCGGGTTACCGCGAGTCCCAA

CACCAAGCTGAGCTTGAGGGTTGAAATGACGCTCGAACAGGCATGCCCCGCCAGAATA  
CTGGCGGGGCGCAATGTGCGTTCAAAGATTCGATGATTCACTGAATTCTGCAATTCACAT  
TACTTATCGCATTTTGTGCGTTCTTCATCGATGCCAGAACCAAGAGATCCGTTGTTGA  
AAGTTTTGATTATTTGTTTGTCTTACTCAGAAGTTCCACTAAAAACAGAGTTTAGGGT  
CCTCGGGCGGGCCGTCCTTTTTACAGGGCGCGGGCTGATCCGCCGAGGCAACGTATA  
GGTATGTTACAGGGGTTTGGGAGTTGTAAACTCGGTAATGATCCCTCCGCTGGTTCAC  
CAACGGAGACCTTGTTAC

>Z1-bt

TGCTGCTTTCTGGTAAGTGCCGAGCTTTTTTTTCTTCTTCGCGTTGGGTATCAATTGACA  
GGTTACTAACTCGATTACAGGCAAACCATCTCTGGCGAGCACGGTCTCGATGGCGATG  
GACAGTAAGTTTAAATGGTGATGTGGGTTTCCGGTAGATCACACGTCTGATATCTTGCTA  
GGTACAATGGTACCTCCGACCTCCAGCTCGAGCGTATGAACGTCTACTTCAACCATGTG  
AGTCCAATCACTGGAACCGAATAATCGTGCATCATCTGATCAGATGTTTTCTTTGATA  
TCTAGGCCAGCGGTGACAAGTACGTTCCCCGTGCCGTTCTCGTCGATTTGGAGCCTGGT  
ACCATGGACGCTGTCCGCTCCGGTCCTTTCGGCAAGCTTTTCCGCCCCGACAACTTCG  
TCTTCGGTCAGTCCGGTGCTGGTAACAACCTGGGCCAAGGG

>Z2-bt

CGGTGCTGCTTTCTGGCAGACCATCTCCGGCGAGCATGGTCTTGACAGCAACGGTGTC  
TACAATGGCACCTCTGAGCTCCAGCTCGAGCGCATGAGCGTTTACTTCAACGAGGTAC  
GTTTGATGGGTACGCGTCGGAAGACGAGAGAGGACTCGATAAACTGACCCGCGTCAAT  
AGGCTTCCGGTAACAAGTACGTTCCCTCGCGCTGTTCTCGTCGATCTCGAGCCCGGTACC  
ATGGACGCTGTCCGTGCTGGTCCCTTCGGTCAGCTTTTCCGCCCCGACAACTTCGTTTT  
CGGTCAATCCGGTGCTGGCAACAACCTGGGCCAAGGGTCAC

>Z3-bt

CGTCTCTGGCGAGCACGGACTCGAAGCAATGGTGTACACACGGTACCTCCGAGCTACA  
GCTAGAGCGCATGAGCGTCTATAAAACGAGGTTCTGTTCCATCACTCCTACCGCGAAA  
ACACAACAAGCTCACGCGCGCCTAGGCTTCCGGTAACAAGTATGTTCCCGTGCCGTC  
CTCGTCGATCTCGAGCCCGGTACCATGGACGCCGTCCGTGCCGGTCCTTTCGGACAGC  
TTTTCCGTCCCGACAACTTCGTTTTTCGGTCAGTCCGGTGCCGGAACAACCTGGGCCAA  
GGGTCACTAATATGAGGGTAA

>Z3-EF

CAAGACTCACCTTAACGTCGTCGTCATCGGCCACGTCGACTCTGGCAAGTCGACCACT  
GTGAGTACTACCTCAATGACCTGCTTATCAGCAGTCATCAACCCCGCCATACGTGGTG  
GGGTAATATCAACTTACACATTTGCTGACAAAATTGCATAGACCGGTCACTTGATCTAC  
CAGTGCGGTGGTATCGACAAGCGAACCATCGAGAAGTTTCGAGAAGGTTGGTTTACATT  
TTCCTCGATCGCACGCCCTCTGCACACCGATCCATCACTCGAATCAGCCTCGATGACTG  
AATATGCGCCTGTACCCCGCTCGAATACAAAATTTTGCGGTTCAACTGCAATTTTTTG  
GTGGGGCTCATACCCCGCTGCTCGAGTGACAGGCGCTTGCCCTCTTCCACAAAATCA  
CCTCTTGCGCGTCACGTGTCAATCAGTCACTAACCACCCGACAATAGGAAGCCGCCGA

GCTCGGTAAGGGTTCCTTCAAGTACGCTTGGGTTCTTGACAAGCTCAAGGCCGAGCGT  
GAGCGTGGTATCACCATCGATATCGCTCTCTGGAAGTTCGAGACTCCTCGCTACTATGT  
CACCGTCATTGGTATGTTGTCATCACTTAACTCATGACCTTCTCATGCTAACATGTTTT  
CCAGACGCTCCCGGTCACCGTGATTCATCAAGAACATGAT
